# Supplementary material
Source: publisher figshare collection journal article supplement (https://acs.figshare.com/ndownloader/files/7881223)
Supplement: Supplementary file 1 [file 7881223]

# Supporting Information for “Generalized Temporal Acceleration Scheme for Kinetic Monte Carlo Simulations of Surface Catalytic Processes by Scaling the Rates of Fast Reactions”

Eric C. Dybeck<sup>†</sup>, Craig P. Plaisance<sup>†</sup>, Matthew Neurock<sup>†‡</sup>

<sup>†</sup>Department of Chemical Engineering, University of Virginia, Charlottesville, VA

<sup>‡</sup>Department of Chemical Engineering and Materials Science, University of Minnesota, Minneapolis, MN

## Additional Details for the Fischer-Tropsch Synthesis Reaction

The rate of individual surface reaction events, such as CO\* inserting into CH<sub>3</sub>\*, are calculated using the familiar equation from Transition State Theory (TST):

(S1)

$$k = \frac{k_B T}{h} e^{\left[\frac{\Delta S^\ddagger}{R}\right]} e^{\left[-\frac{\Delta E^\ddagger}{RT}\right]}$$

where  $k$  is the rate,  $k_B$  is the Boltzmann constant,  $T$  is the temperature,  $h$  is Plank’s constant,  $\Delta S^\ddagger$  and  $\Delta E^\ddagger$  are the entropy change and energy change between the reactant state and transition state, and  $R$  is the ideal gas constant. Molecular adsorption events, such as gas phase CO adsorbing on to a metal site, are assumed to be non-activated processes and the rate constants are calculated from collision theory using:

(S2)

$$k = \frac{P_i A S_i}{\sqrt{2\pi M_i R T}}$$

Where  $P_i$  is the gas phase pressure of reactant  $i$ ,  $A$  is the cross-sectional area of the reactive site,  $S_i$  is the sticking coefficient of reactant  $i$  (assumed to be unity), and  $M_i$  is the molecular weight of reactant  $i$ . To ensure that microscopic reversibility is preserved, the rate constant of the reverse reactions for all processes are calculated using:

(S3)

$$k_{rev} = k_{for} K_{eq}^{-1} = k_{for} e^{\left[-\frac{\Delta S}{R}\right]} e^{\left[\frac{\Delta E}{RT}\right]}$$

where  $k_{rev}$  is the rate constant of the reverse reaction,  $k_{for}$  is the forward reaction rate constant,  $K_{eq}$  is the equilibrium constant of the process, and  $\Delta S$  and  $\Delta E$  are the differences in entropy and energy between the reactant and product state of the forward reaction.

The Kinetic Monte Carlo simulation algorithm was carried out using a code recently developed to model catalytic reactions occurring on metal nanoclusters. The details of this model will be elaborated in a subsequent manuscript. Briefly, the catalyst is modeled as a 4.2 nm cubo-octahedral particle built out of an infinite ruthenium lattice (shown in Figure S1). The surface reactions are allowed to occur on the exposed (111) terraces of the nanoparticle, consistent with theoretical and experimental observations [46,52]. This particle consists of 2406 Ruthenium atoms, with 752 atoms on the surface of the particle and 488 of them residing on the exposed 111 terraces. The surface bound intermediates  $\text{CO}^*$ ,  $\text{CH}_x^*$  ( $x=1, 2, 3$ ), and  $\text{C}_2\text{H}_y^*$  ( $y=0, 1, 2, 3$ ) occupy a single site. Larger intermediates such as  $^*\text{R-CO}^*$  and  $^*\text{R-COH}^*$  ( $\text{R}=\text{H}, \text{CH}_3$ ) sit di-sigma and block 2 adjacent surface atop sites. Theoretical investigations have shown that surface hydrogen species ( $\text{H}^*$ ) prefer to sit in the 3-fold fcc sites in between the ruthenium surface atoms and interact very weakly with all nearby intermediates. This is consistent with experimental infrared spectroscopy studies that suggest the presence of chemisorbed surface hydrogen does not inhibit carbon monoxide uptake [52]. In addition, hydrogen represents a minority species on the surface under all conditions of practical interest. We have therefore chosen to model all hydrogen addition and elimination reaction as referenced back to the gas phase molecular hydrogen in place of modeling  $\text{H}^*$  explicitly. The rate constants for hydrogen addition reactions are calculated using:

(S4)

$$k = P_{\text{H}_2} \frac{k_b T}{h} e^{\left[-\frac{S_{\text{H}_2}}{2R}\right]} e^{\left[-\frac{\Delta E_{\text{H}_2}}{2RT}\right]} e^{\left[\frac{\Delta S^\ddagger}{R}\right]} e^{\left[-\frac{\Delta E^\ddagger}{RT}\right]}$$

where  $P_{\text{H}_2}$  is the partial pressure of hydrogen,  $\Delta E_{\text{H}_2}$  is the adsorption energy of  $\text{H}_2$ , and  $S_{\text{H}_2}$  is the entropy of gas phase  $\text{H}_2$ .

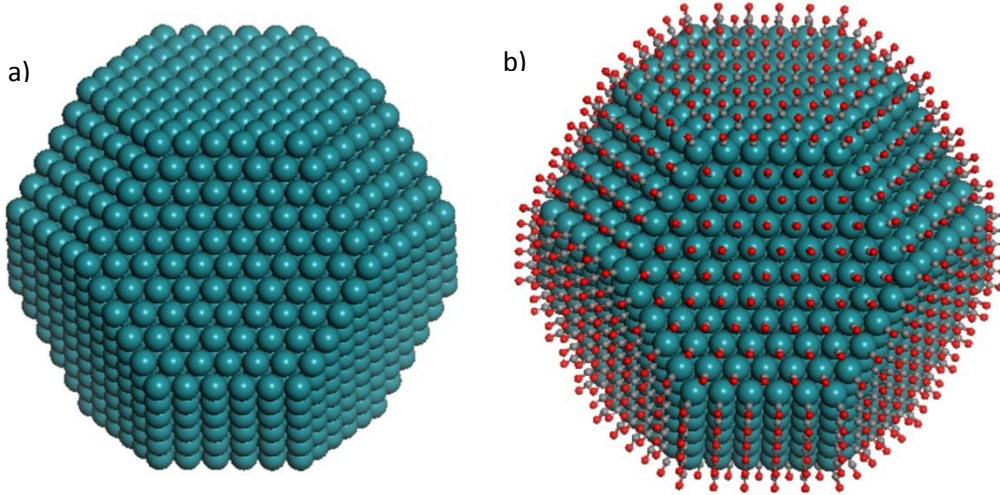

**Figure S1.** Model 4.2 nm metal particle consisting of 2406 Ruthenium atoms, shown both (a) bare and (b) at 1ML coverage of carbon monoxide. CO adsorption and desorption events occur at all surface metal atoms. The Fischer-Tropsch synthesis reaction steps proceeds on the exposed (111) terraces.

The kinetic inputs to the simulation have been loosely adopted from the DFT energetics calculated in ref 47. The activation barriers have been modified to more closely match experimental values; however the overall mechanism and rate-limiting step remain the same. A summary of the energetic and entropic barriers for each elementary reaction is shown in Table 1. For simplicity, the effects of lateral interactions on the activation barriers are not included, however this coarse-graining algorithm could easily be extended to systems where repulsive interactions influence kinetics. We also briefly note that the intrinsic forward and reverse rate constants for each reaction include a factor describing the number of nearest-neighbor sites that can facilitate the reaction. This factor is specific to the lattice being used to model the reactions and is necessary to match the KMC simulation data with the mean-field analytical model. Atop sites on (111) terraces have 6 nearest neighbor atop sites (included for additions between atop-bound intermediates) and 3 nearest neighbor 3-fold sites (used for additions and removal of hydrogen).

**Table S1.** Elementary reactions along with energetic and entropic changes between the reactant state, transition state, and product state.

|    | Reaction                                                         | $\Delta E^\ddagger$ | $\Delta S^\ddagger$ | $\Delta E$ | $\Delta S$ |
|----|------------------------------------------------------------------|---------------------|---------------------|------------|------------|
| 1  | $CO_{(g)} + * \rightleftharpoons CO^*$                           | 0.0                 | 0.0                 | -80.0      | -163.5     |
| 2  | $CO^* + * + \frac{1}{2}H_{2(g)} \rightleftharpoons *HCO^*$       | 37.2                | -118.7              | 25.2       | -118.7     |
| 3  | $*HCO^* + \frac{1}{2}H_{2(g)} \rightleftharpoons *HCOH^*$        | 38.0                | -71.7               | 5.6        | -71.7      |
| 4  | $*HCOH^* \rightleftharpoons CH^* + OH^*$                         | 17.2                | 0.0                 | -43.8      | 0.0        |
| 5  | $CH^* + \frac{1}{2}H_{2(g)} \rightleftharpoons CH_2^*$           | 25.0                | -71.7               | -10.0      | -71.7      |
| 6  | $CH_2^* + \frac{1}{2}H_{2(g)} \rightleftharpoons CH_3^*$         | 25.0                | -71.7               | -10.0      | -71.7      |
| 7  | $CH_3^* + \frac{1}{2}H_{2(g)} \rightarrow CH_{4(g)} + *$         | 25.0                | -71.7               | -          | -          |
| 8  | $CO^* + CH_3^* \rightarrow *CH_3CO^*$                            | 30.0                | -47.0               | -38.0      | -47.0      |
| 9  | $*CH_3CO^* + \frac{1}{2}H_{2(g)} \rightarrow *CH_3COH^*$         | 20.0                | -71.7               | -40.0      | -71.7      |
| 10 | $*CH_3COH^* \rightarrow CH_3C^* + OH^*$                          | 20.0                | 0.0                 | -40.0      | 0.0        |
| 11 | $CH_3C^* + \frac{1}{2}H_{2(g)} \rightleftharpoons CH_3CH^*$      | 25.0                | -71.7               | -10.0      | -71.7      |
| 12 | $CH_3CH^* + \frac{1}{2}H_{2(g)} \rightleftharpoons CH_3CH_2^*$   | 25.0                | -71.7               | -10.0      | -71.7      |
| 13 | $CH_3CH_2^* + \frac{1}{2}H_{2(g)} \rightarrow CH_3CH_{3(g)} + *$ | 25.0                | -71.7               | -          | -          |
| 14 | $OH^* + \frac{1}{2}H_{2(g)} \rightarrow H_2O_{(g)} + *$          | 20.0                | -71.7               | -          | -          |

## Mean-Field Kinetic Model of the Fischer-Tropsch Synthesis Process

The overall scheme for the Fischer-Tropsch Synthesis process is shown in Figure S2 and is reproduced from the main text Figure 5. Initially, gas phase CO adsorbs on to the surface. Assuming that CO\* is the most abundant surface intermediate, and that CO\* is quasi-equilibrated with the gas phase, the surface concentration of CO\* and free sites \* can be represented as:

(S5)

$$[CO^*] = \frac{K_{CO}P_{CO}}{1 + K_{CO}P_{CO}}$$

(S6)

$$[*] = \frac{1}{1 + K_{CO}P_{CO}}$$

Hydrogen adsorbs noncompetitively from the gas phase and participates in multiple subsequent hydrogen addition steps. Because hydrogen is equilibrated with the surface at all conditions examined in this study and the concentration is low, the surface hydrogens are referenced back to the gas phase reactants by:

(S7)

$$[H^*] \approx \sqrt{K_{H_2}P_{H_2}}$$

The rate of the unequilibrated hydrogen addition to the \*HCO\* species is related to the surface concentration of CO\* and hydrogen pressure using the equilibrium of the first two mechanistic steps.

(S8)

$$r_3 = k_3\sqrt{P_{H_2}}[*HCO^*] = k_3K_2K_1P_{H_2}[CO^*][*]$$

Substituting the results from eqs. (S5) and (S6) into eq. (S8) leads to the rate of CO-activation presented in eq. (14) of the main text:

(S9)

$$r_3 = \frac{k_3K_2K_1P_{H_2}P_{CO}}{(1 + K_1P_{CO})^2}$$

The selectivity to methane is the ratio of the methane production to methane and ethane production in the FTS reaction. Both the hydrogen addition to CH<sub>3</sub> and the hydrogen addition to CH<sub>3</sub>CH<sub>2</sub> irreversibly produce methane and ethane, respectively. However, we observe that the CO insertion into CH<sub>3</sub> is

unequilibrated and essentially always leads to the production of ethane. Therefore, the rate of ethane production is equal to the rate of the CO insertion into surface CH<sub>3</sub>. The selectivity to methane is therefore:

(S10)

$$X_{CH_4} = \frac{r_7}{r_7 + r_8} = \frac{k_7 \sqrt{P_{H_2}} [CH_3^*]}{k_7 \sqrt{P_{H_2}} [CH_3^*] + k_8 [CH_3^*] [CO^*]} = \frac{k_7 \sqrt{P_{H_2}}}{k_7 \sqrt{P_{H_2}} + k_8 [CO^*]}$$

Substituting the results from eqs. (S5) and (S6) into eq. (S10) leads to the selectivity to methane presented in eq. (15) of the main text:

(S11)

$$X_{CH_4} = \frac{r_7}{r_7 + r_8} = \frac{k_7 \sqrt{P_{H_2}}}{k_7 \sqrt{P_{H_2}} + \frac{k_8 K_1 P_{CO}}{1 + K_1 P_{CO}}}$$

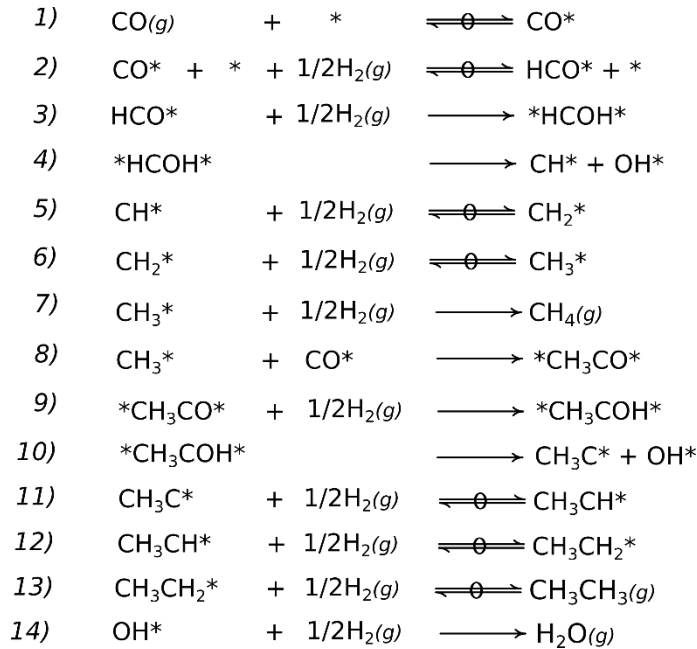

**Figure S2.** Reaction network for Fischer-Tropsch synthesis.

## Optional Subroutines to Improve Efficiency

The procedure described in the main text of unscaling all reactions and re-equilibrating the quasi-equilibrated reactions after an unequilibrated reaction event rigorously ensures simulation accuracy. However, this also significantly reduces the simulation efficiency during the initial approach to equilibrium where many fast processes are still considered unequilibrated. To improve the efficiency, one can optionally bypass the reaction unscaling if the unequilibrated process belongs to the same reaction channel as the previous unequilibrated process executed. If the unequilibrated process just executed belongs to the same reaction channel as the last unequilibrated reaction executed before it, then it is likely that the rates of the reaction channels in the new superbasin are similar to those in the previous superbasin such that the previous scaling factors are still acceptable. This is due to the fact that the stiffness that necessitates rescaling and re-equilibration arises primarily when a fast unequilibrated reaction immediately follows a slow unequilibrated reaction (i.e., two *different* unequilibrated reactions).

If the reactions are not unscaled, due to the above scenario, the scaling factors cannot be updated until the reaction rates have been sampled with sufficient accuracy. We therefore use the scaling factors from the previous superbasin until the system has reached equilibration in the current superbasin (all of the quasi-equilibrated reactions with non-zero rates have executed  $n_e$  times in the superbasin). At this point, we have adequately sampled the new superbasin and the scaling factors can be updated accurately using eq. **Error! Reference source not found.** If the system exits the superbasin before equilibration has occurred and the unequilibrated process by which it exits is from the same reaction channel as the previous unequilibrated step, then the scaling factors for those reactions that have been sufficiently executed in the current superbasin are updated just prior to exiting for use in the new superbasin. For those quasi-equilibrated reactions that have not yet been sufficiently executed, the scaling factors are reset to unity. The entire unscaling procedure with scaling factor freezing is depicted in Figures S3 and S4.

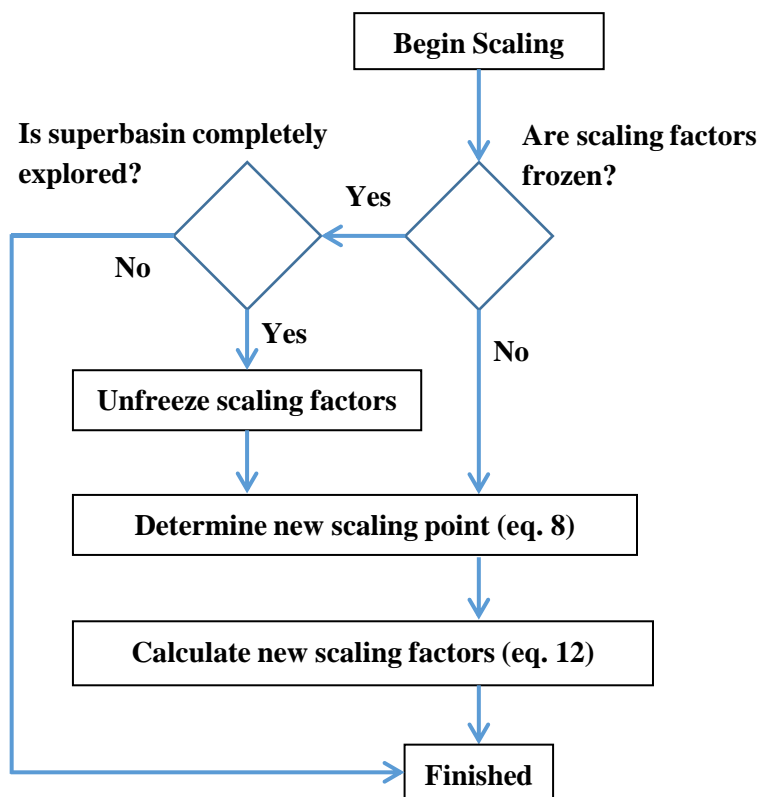

**Figure S1.** Flow diagram depicting the reaction scaling procedure

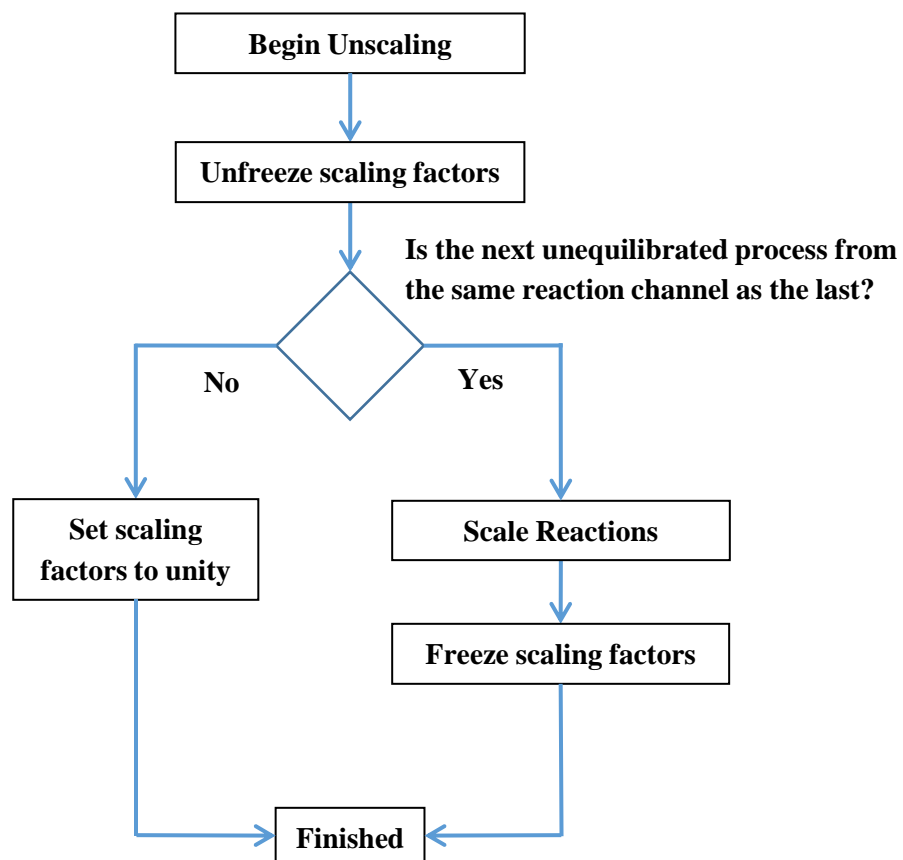

**Figure S2.** Flow diagram depicting the unscaling procedure carried out after execution of an unequilibrated process

## Pseudocode for the Proposed Reaction Scaling Algorithm

**# Initialize step, time, scaling factors, and reaction counters**

$i = 0$            # simulation step

$t = 0$            # simulation time

**For** each reaction  $m$  in *all\_reactions*:

$\alpha_m = 0$        # scaling factor

$N_m = 0$        #  $n_e$  element array containing execution history

$p_m = 0$        # current position in array  $N_m$

$n_{e,m} = 0$      # number of executions in current superbasis

$r_m = 0$        # rate of forward reaction

$r_{-m} = 0$      # rate of reverse reaction

**Flag** reaction  $m$  as not *sufficiently\_executed*

**Flag** reaction  $m$  as *unequilibrated*

**Next** reaction

**# Main loop**

**Do** main\_loop:

**# Populate the Event Table**

**For** each site  $s$  in *all\_sites*:

**For** each reaction  $m$  in *all\_reactions*:

**If** reaction  $m$  is possible for site  $s$  and this  
            configuration in the forward/reverse direction:

                Add a new event  $e$  to list *all\_events* for reaction  
                 $m$  in the forward/reverse direction with rate  
                constant  $k_e$  and scaling factor  $\alpha_e = \alpha_m$

**Next** reaction

**Next** site

**# calculate the rate constants of all reaction channels from current configuration**

**For** each reaction  $m$  in  $all\_reactions$ :

$$k_{m,i} = 0$$

$$k_{-m,i} = 0$$

**For** each event  $e$  in  $all\_events$ :

**If** event  $e$  is a reaction of type  $m$  in forward direction:

$$k_{m,i} = k_{m,i} + k_e$$

**If** event  $e$  is a reaction of type  $m$  in reverse direction:

$$k_{-m,i} = k_{-m,i} + k_e$$

**Next** event

**Next** reaction

**# pick an event to occur at this step**

$RN = \text{rand}(0,1)$       # uniform random number between 0 and 1

$$k_{sum} = 0$$

$$counter = 0$$

**For** each event  $e$  in  $all\_events$ :

$$k_{sum} = k_{sum} + \eta_e k_e$$

**Next** event

**For** each event  $e$  in  $all\_events$ :

$$counter = counter + \frac{\alpha_e k_e}{k_{sum}}$$

**If** ( $counter > RN \times k_{sum}$ ) :

$$selected\_event = e$$

**Next** event

```

# unscale reactions when an unequilibrated reaction is executed

If selected_event is an unequilibrated reaction:
     $N_{\text{superbasin}} = i$ 
    Call unscale_reactions()

Update configuration based on selected_event

# increment the reaction counters and determine
reversibility/equilibration of selected reaction channel

Set m to the reaction channel of selected_event

If selected_event occurs in forward direction of reaction channel
m:
     $N_m(p_m) = 1$ 
Else:
     $N_m(p_m) = -1$ 
 $p_m = \text{mod}(p_m + 1, n_e)$ 
 $n_{e,m} = n_{e,m} + 1$ 

If  $\sum |N_m| = n_e$  and  $|\sum N_m| < \delta n_e$ :
    Flag reaction m as quasi-equilibrated
    If  $n_{e,m} \geq n_e$ :
        Flag reaction m as sufficiently_executed
    Else:
        Flag reaction m as unequilibrated
        Flag reaction m as not sufficiently_executed

# increment simulation time

RN = rand(0,1)      # uniform random number between 0 and 1

```

$$\Delta t_i = -\frac{\ln(RN)}{k_{sum}}$$

$$t = t + \Delta t_i$$

**# update reaction rates**

**For** each reaction  $m$  in *all\_reactions*:

$$r_m = r_m + k_{m,i}\Delta t_i$$

$$r_{-m} = r_{-m} + k_{-m,i}\Delta t_i$$

**Next** reaction

**# rescale reactions every  $N_s$  steps**

**If**  $(\text{mod}(i, N_s) = 0)$  **And**  $(i - N_{superbasin}) > N_s$ :

**Call** *scale\_reactions()*

**# increment simulation step**

$$i = i + 1$$

**Next** *main\_loop*

**#Subroutine to unscale all reactions**

**Subroutine** *unscale\_reactions()*:

**# reset reaction rates and counters**

**For** each reaction  $m$  in *all\_reactions*:

$$n_{e,m} = 0$$

$$r_m = 0$$

$$r_{-m} = 0$$

**Flag** reaction  $m$  as not *sufficiently\_executed*

```

Next reaction

# unfreeze scaling factors in case they were frozen
rescaling = true

# reset or update scaling factors
# different behavior depending on whether next unequilibrated
reaction is identical to the last unequilibrated reaction
If next unequilibrated reaction is different from last
unequilibrated reaction:
    # unscale all reactions
    For each reaction m in all_reactions:
         $\alpha_m = 1$ 
    Next reaction
Else:
    # update and freeze scaling factors
    Call scale_reactions()
    rescaling = false

End Subroutine

#Subroutine to scale the reactions
Subroutine scale_reactions()

# if scaling factors are frozen, start updating them again when
all quasi-equilibrated reactions have been sufficiently executed
If rescaling is false:
    If all quasi-equilibrated reactions are
    sufficiently_executed:
        rescaling = true
    Else:

```

### Exit Subroutine

**# calculate the rate of escape from the current superbasin**

$$r_{\tau} = 0$$

**For** each reaction  $m$  in *all\_reactions*:

**If** reaction  $m$  is not *sufficiently\_executed*:

$$r_{\tau} = r_{\tau} + r_m + r_{-m}$$

**Next** reaction

**# calculate scaling factors**

**For** each reaction  $m$  in *all\_reactions*:

**If** reaction  $m$  is *sufficiently\_executed*:

$$\alpha_m = \min\left(N_f \frac{2 r_{\tau}}{r_m + r_{-m}}, 1\right)$$

**Else:**

$$\alpha_m = 1$$

**Next** reaction

**End Subroutine**
